# Supplementary material for: Limited Reliability of the Spot Urine Protein/Creatinine Ratio in the Longitudinal Evaluation of Patients With Lupus Nephritis
Source: PubMed Central journal article supplement — Kidney Int Rep. 2018 Apr 27;3(5):1057–63. doi: 10.1016/j.ekir.2018.04.010 (PMC6127448; doi:10.1016/j.ekir.2018.04.010), 2018-04-27

ID 00112

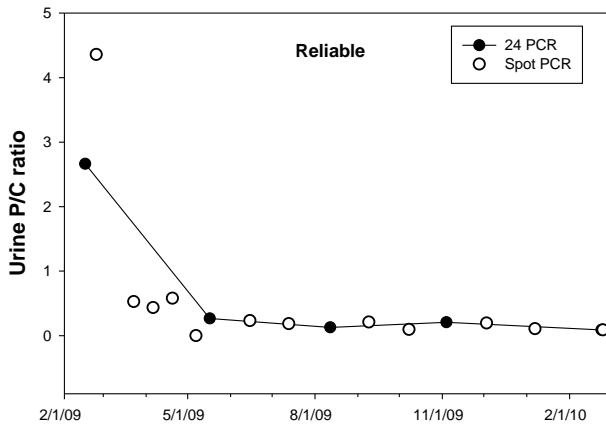

ID 00141

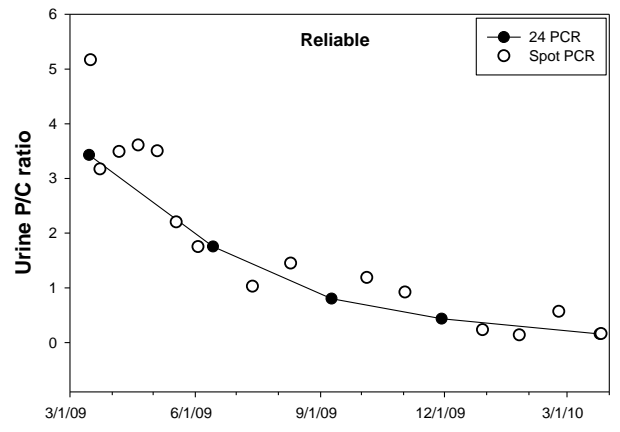

ID 00158

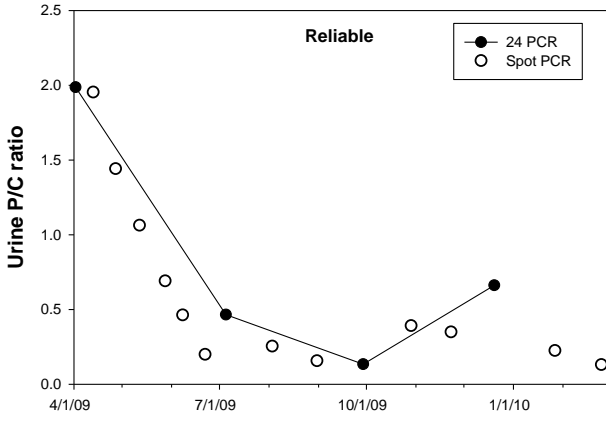

ID 00171

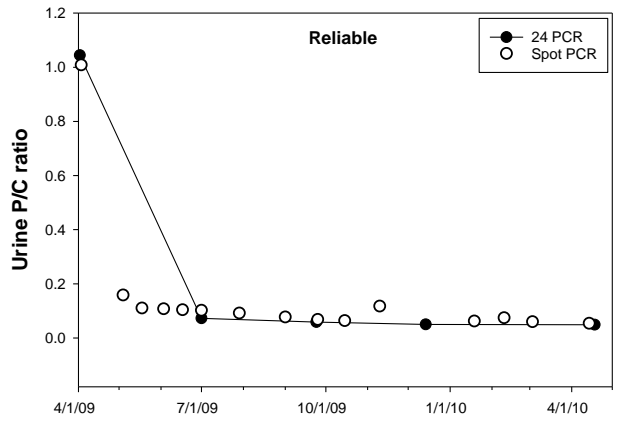

ID 00186

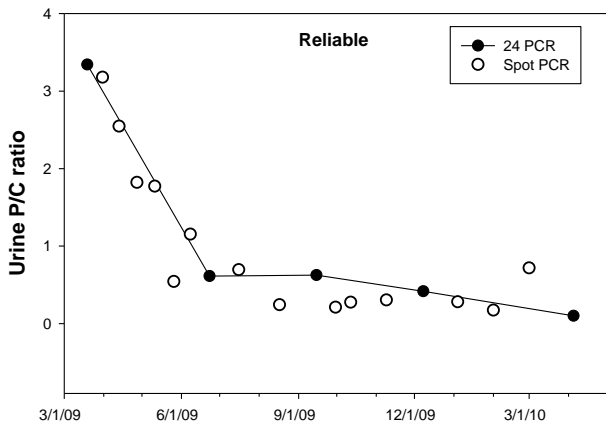

ID 00285

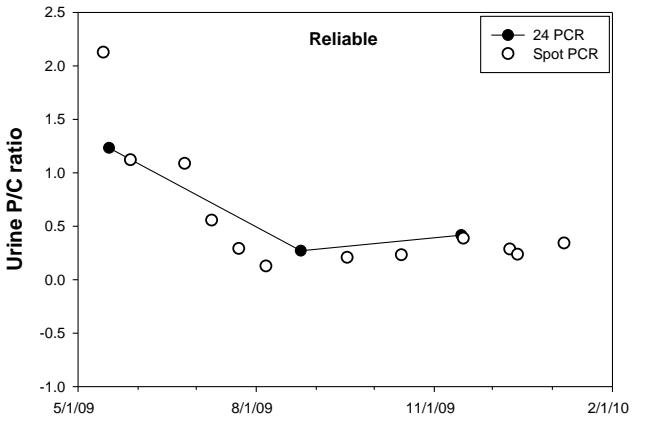

ID 00402

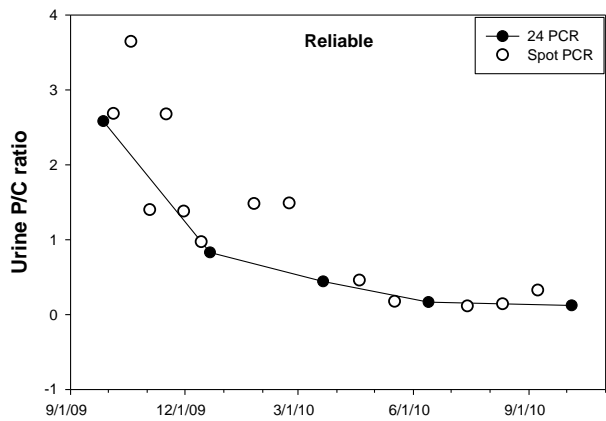

ID 00451

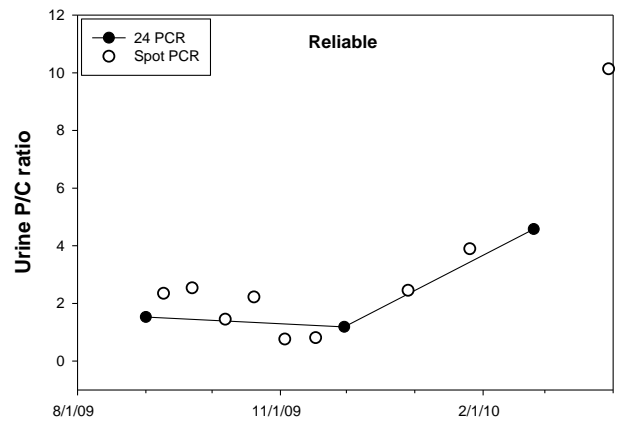

ID 00485

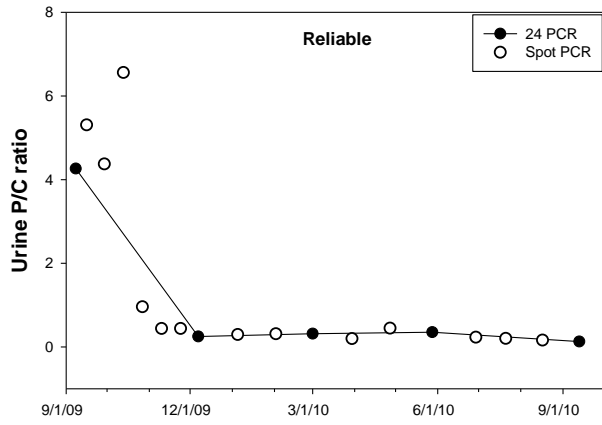

ID 00527

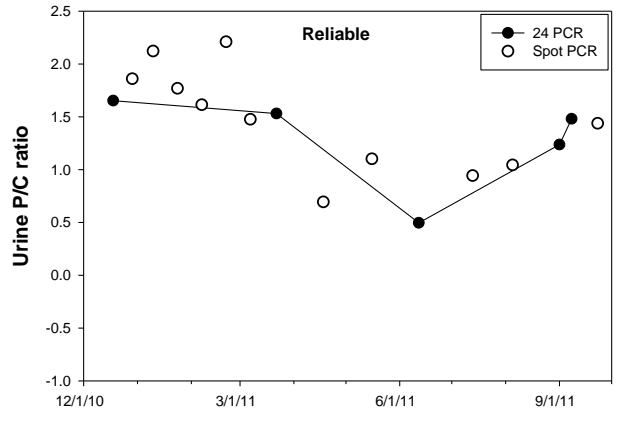

ID 00615

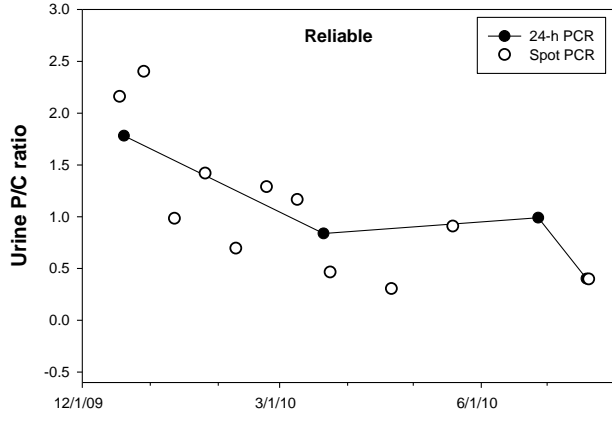

ID 00813

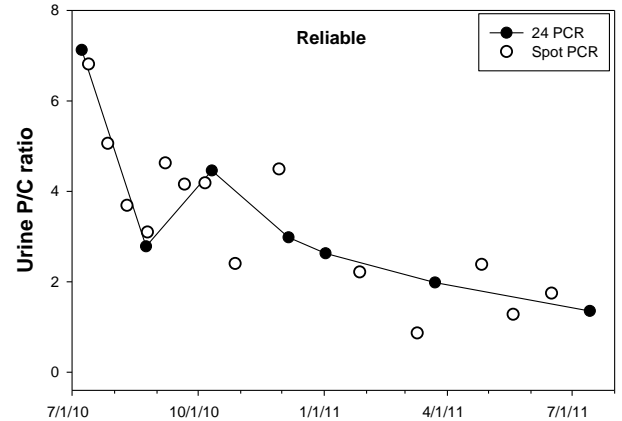

ID 00827

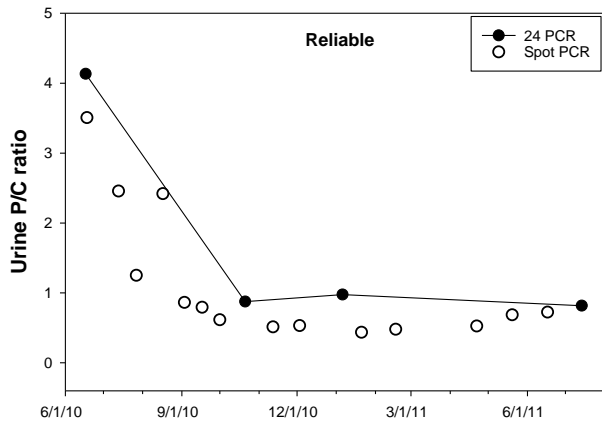

ID 00858

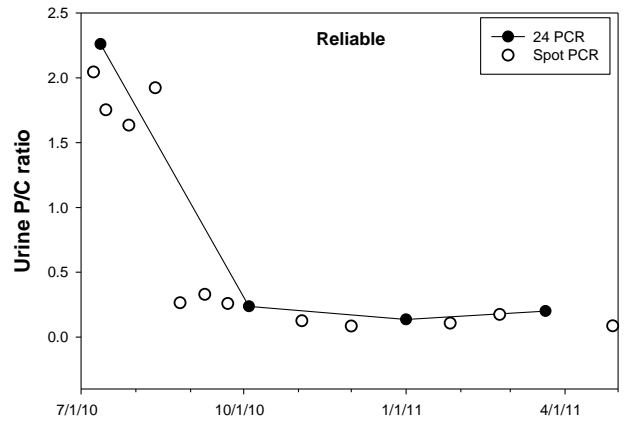

ID 00900

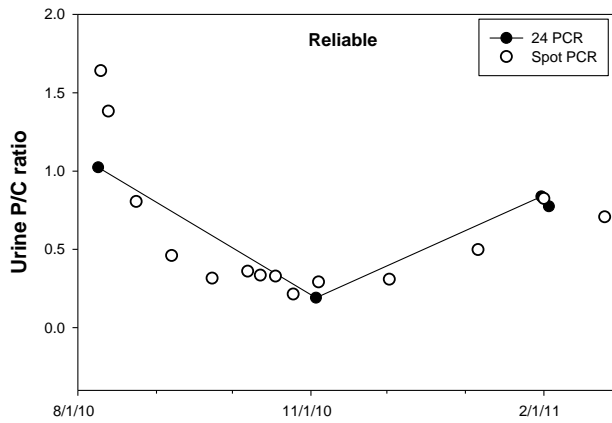

ID 00912

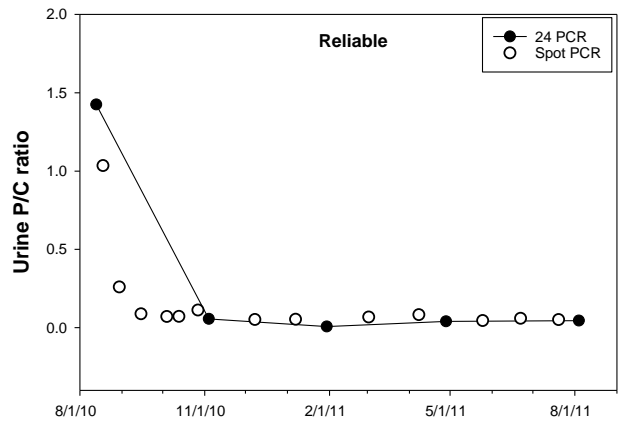

ID 00962

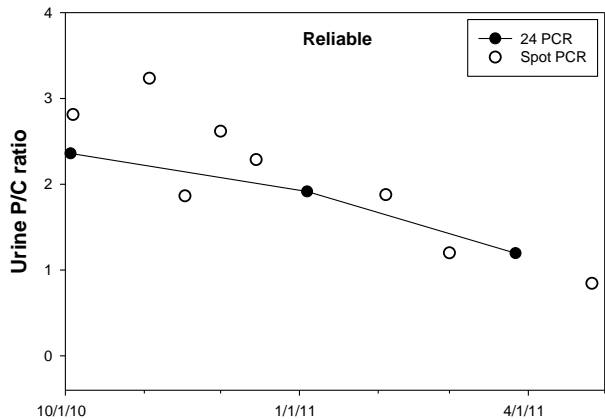

ID 00977

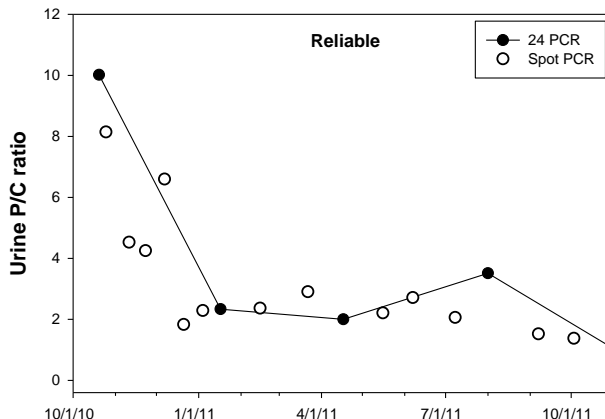

ID 01097

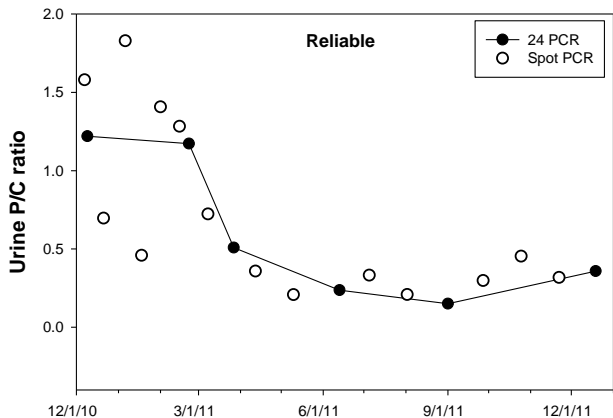

ID 01097

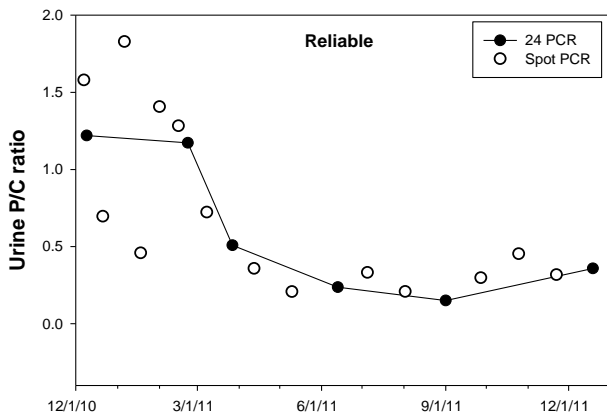

ID 01129

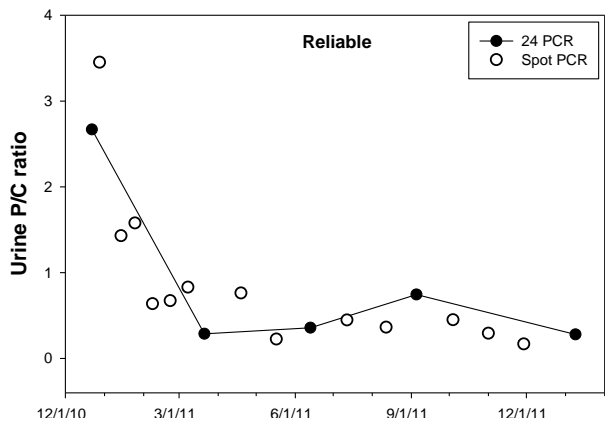

ID 01131

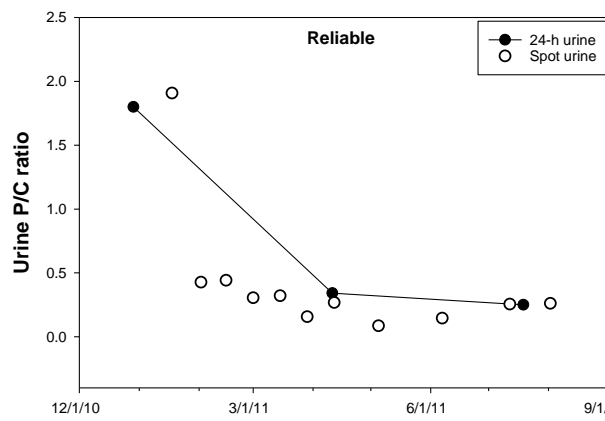

ID 01159

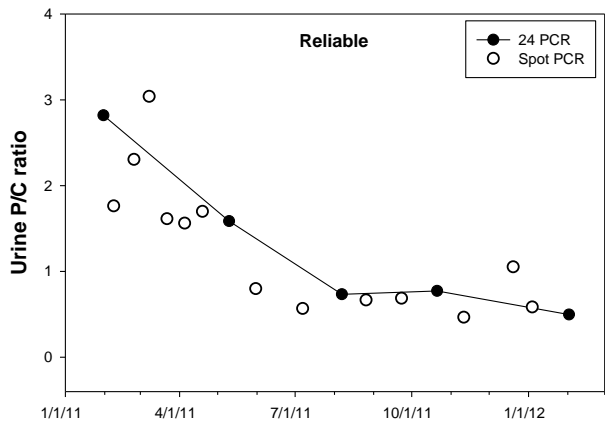

ID 01166

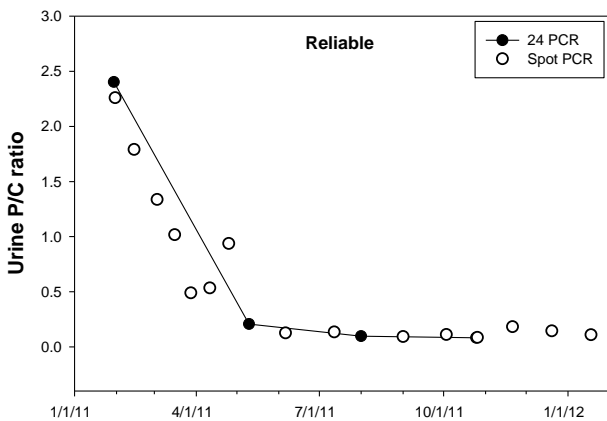

ID 01286

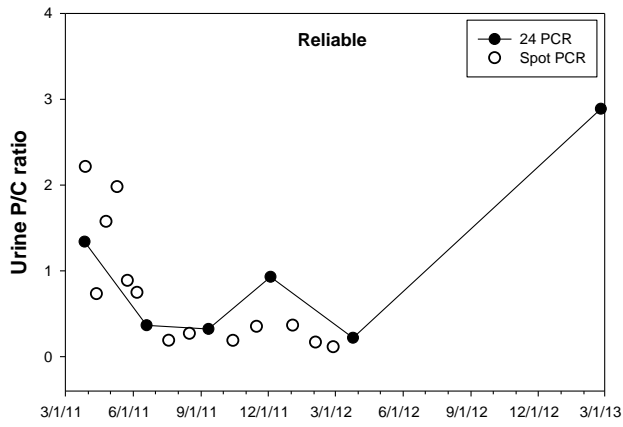

ID 01294

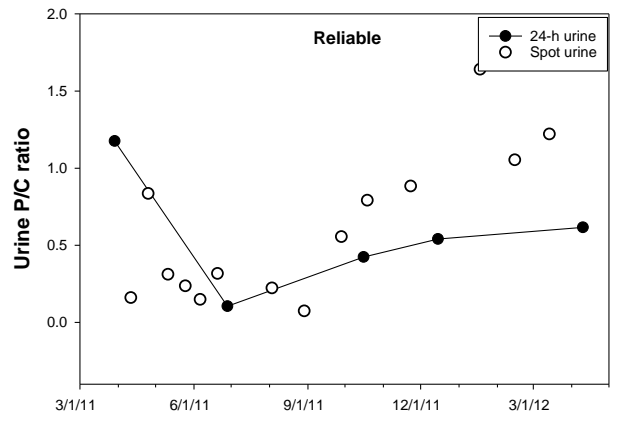

ID 01308

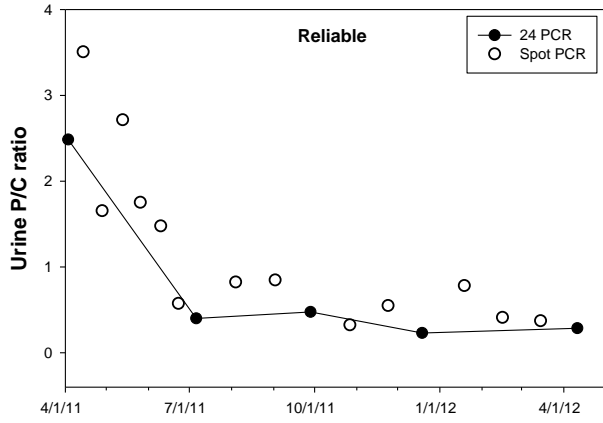

ID 01345

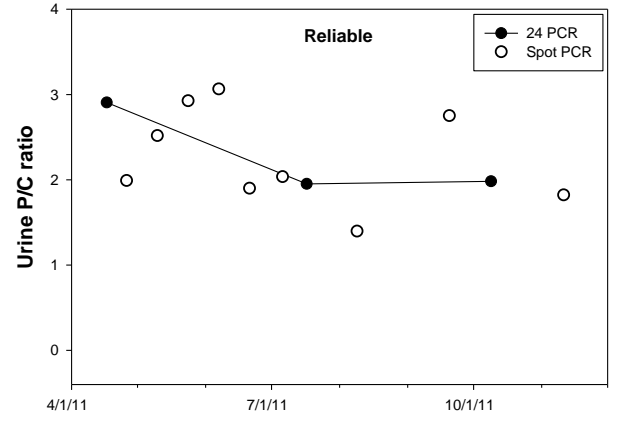

ID 01399

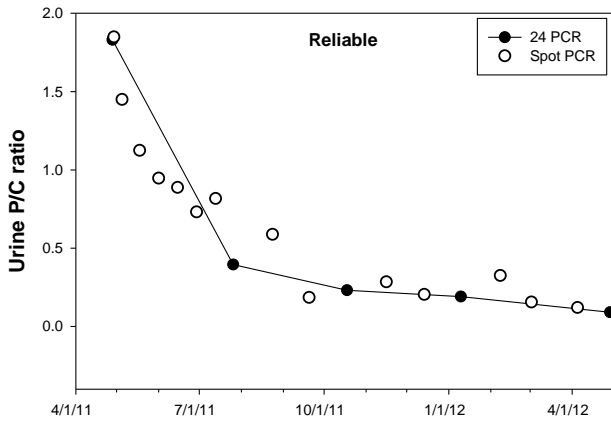

ID 01472

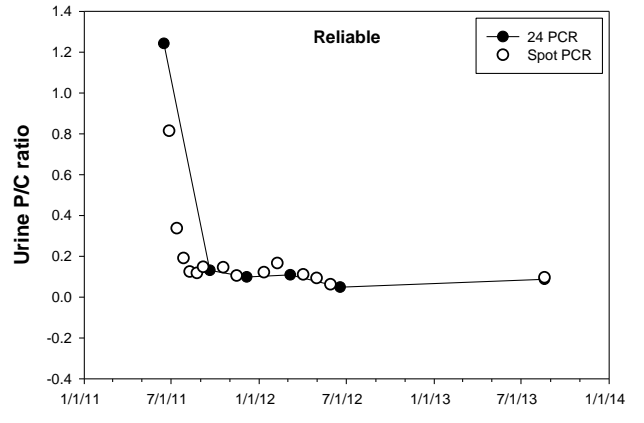

ID 01592

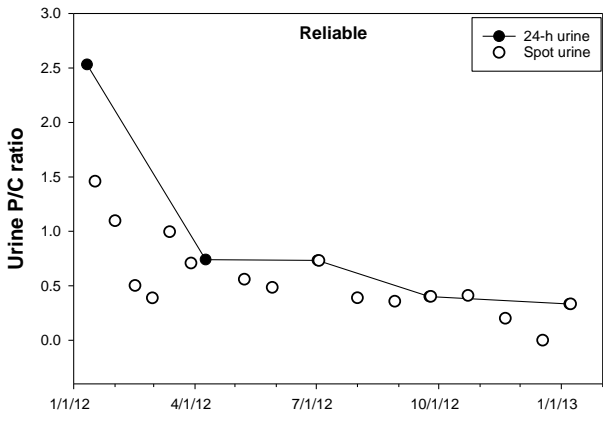

ID 01616

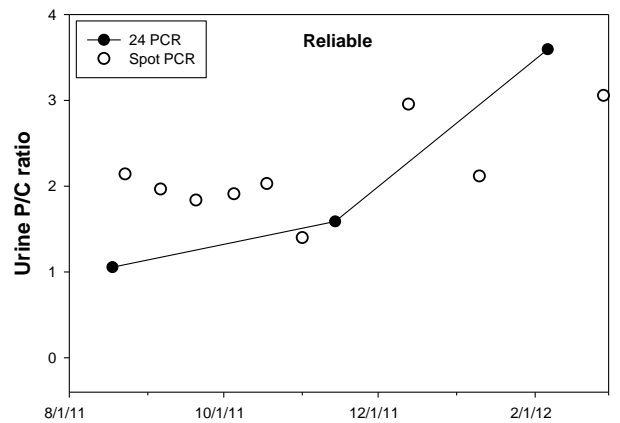

**ID 01641**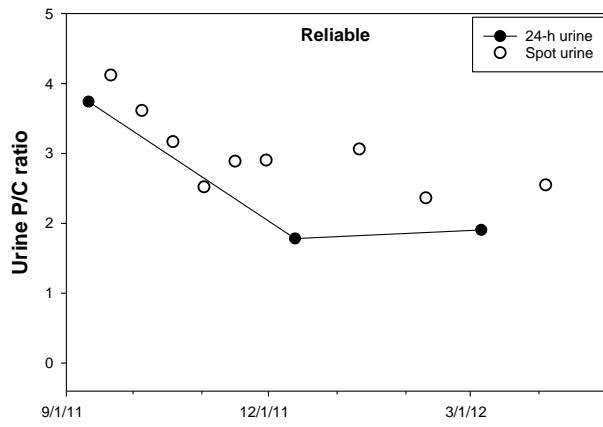**ID 01690**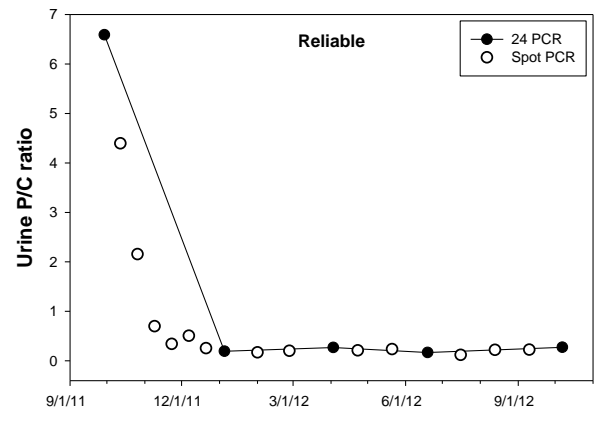**ID 01714**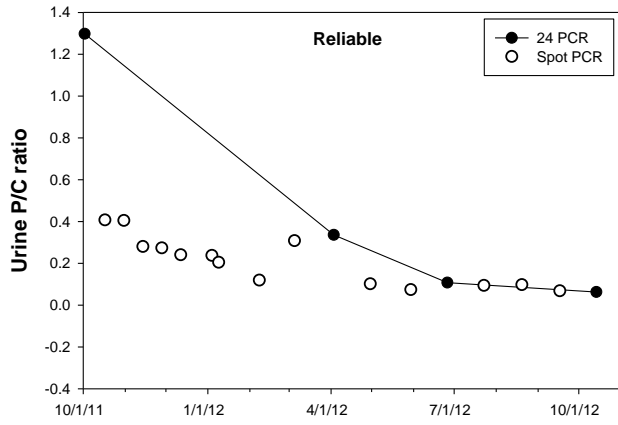**ID 01735**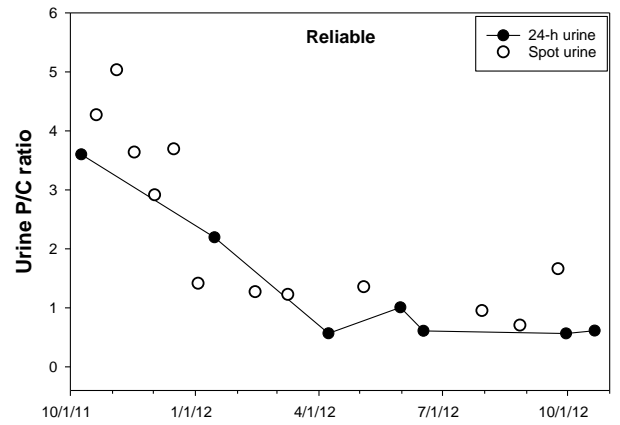**ID 01939**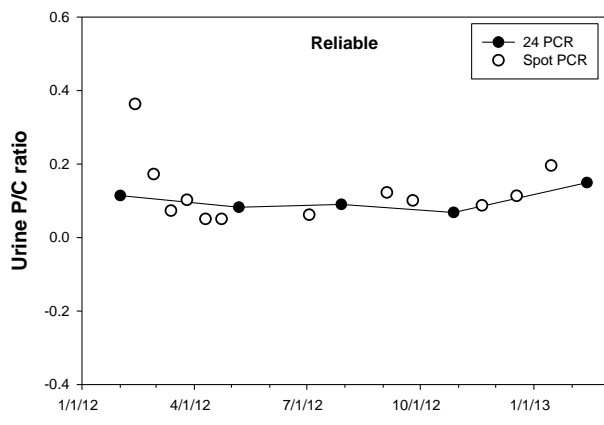**ID 01952**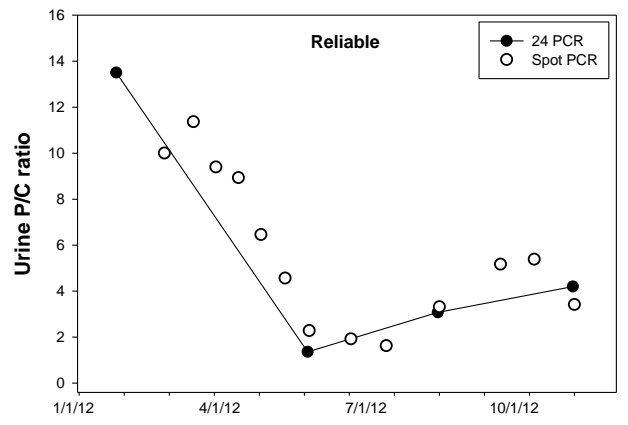**ID 02014**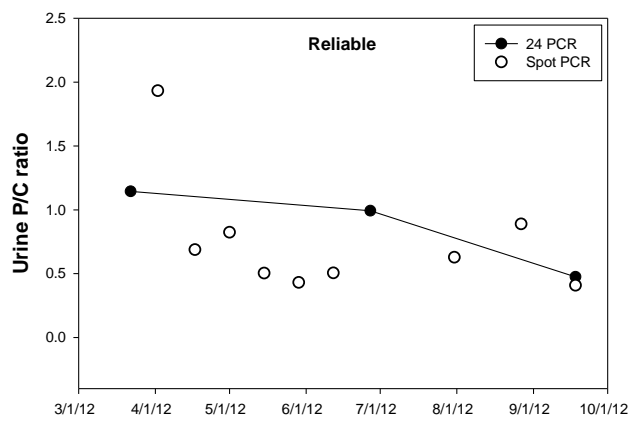**ID 02039**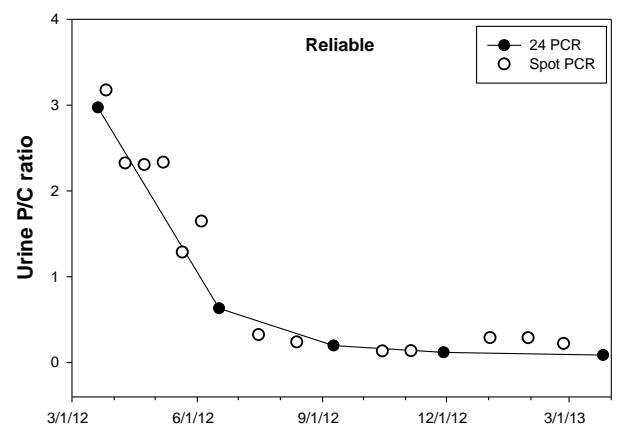

ID 02102

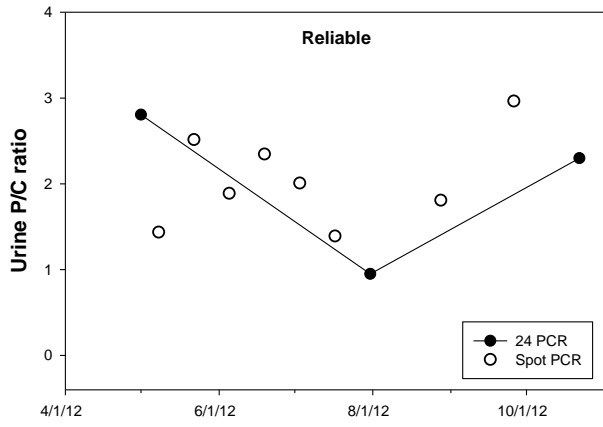

ID 02192

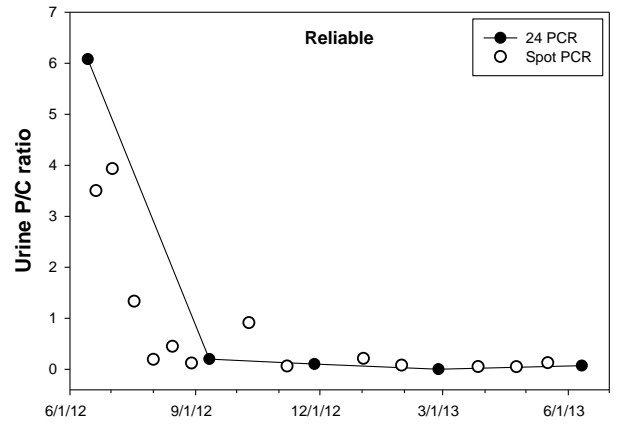

ID 00046

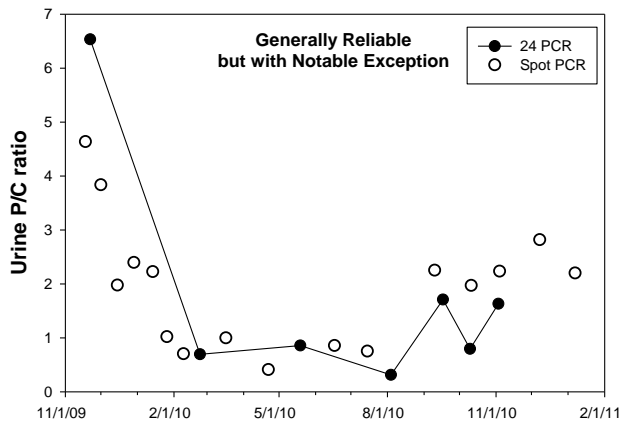

ID 00078

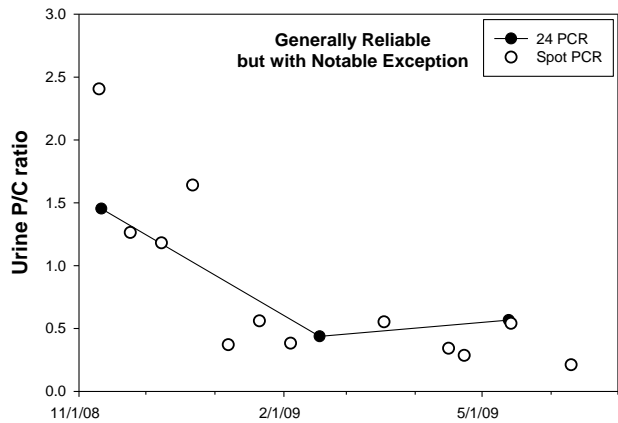

ID 00212

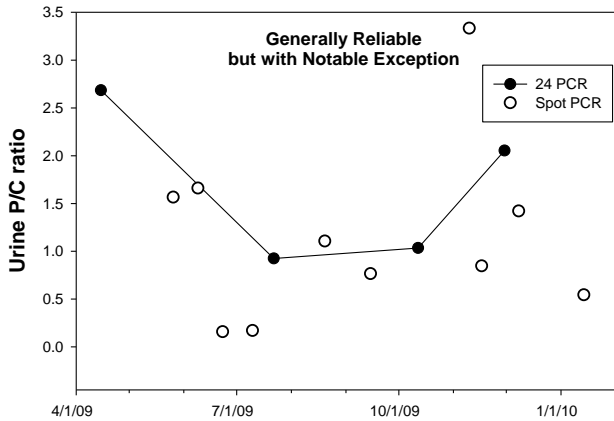

ID 00265

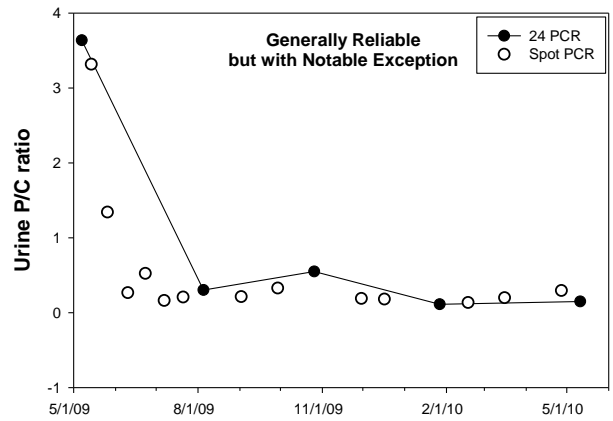

ID 00342

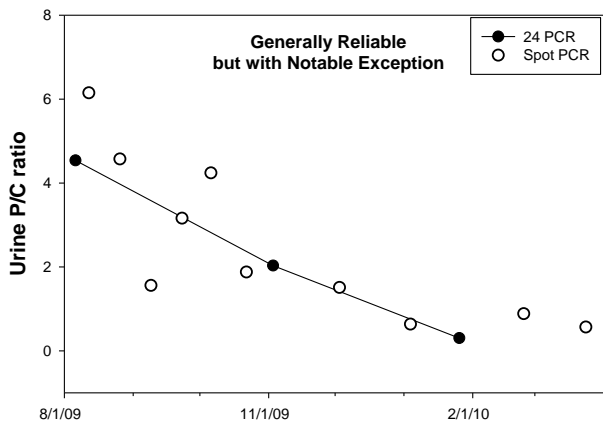

ID 00430

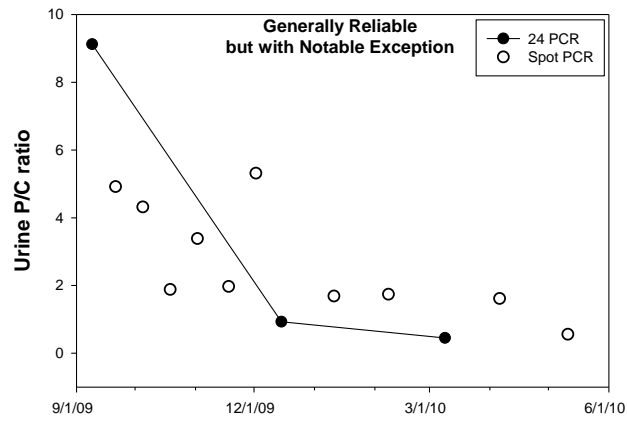

ID 00691

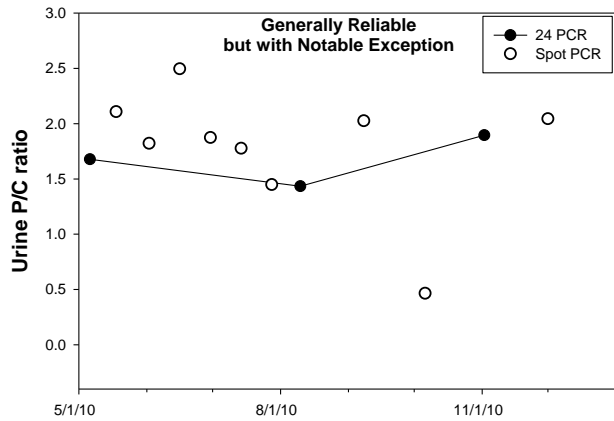

ID 00759

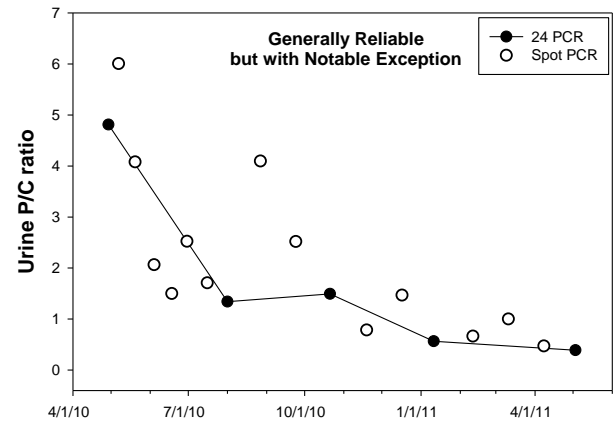

ID 00772

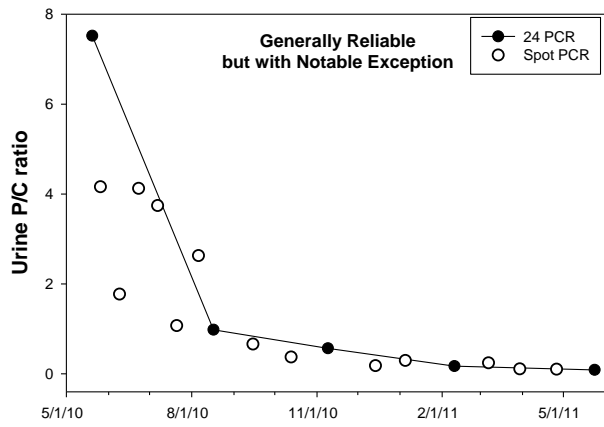

ID 00833

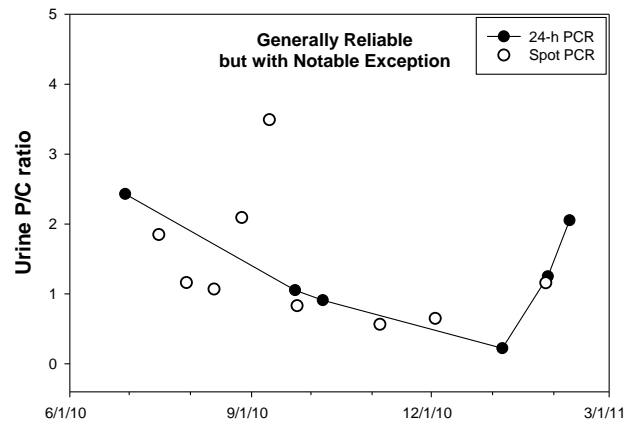

ID 01002

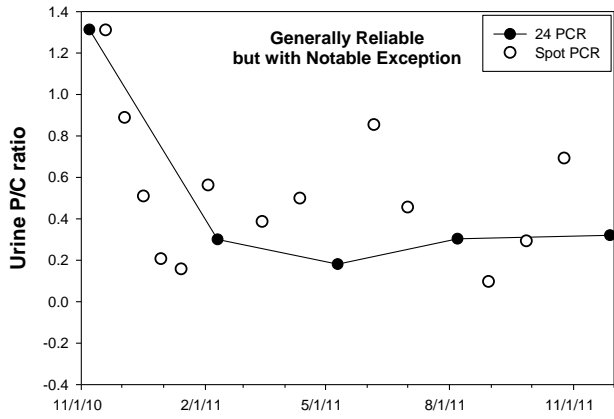

ID 01013

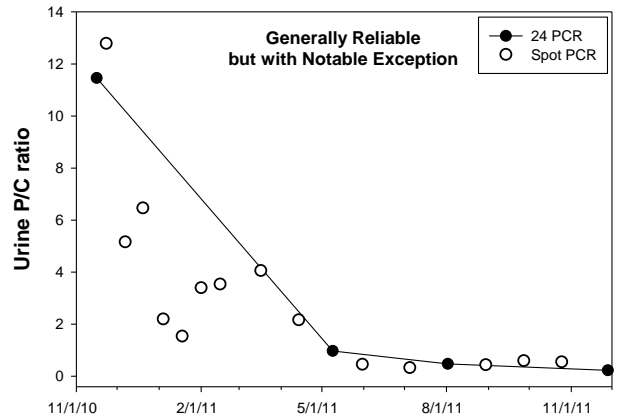

ID 01031

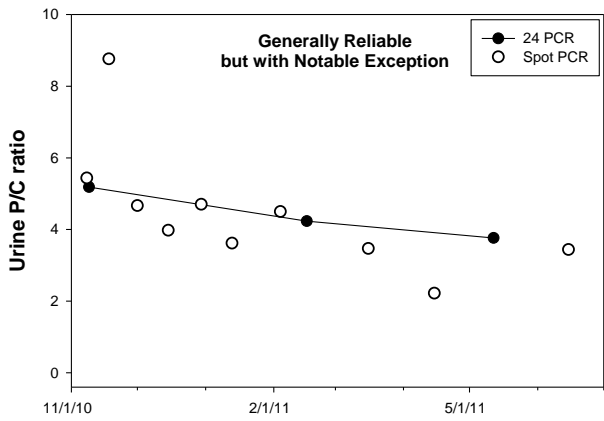

ID 01067

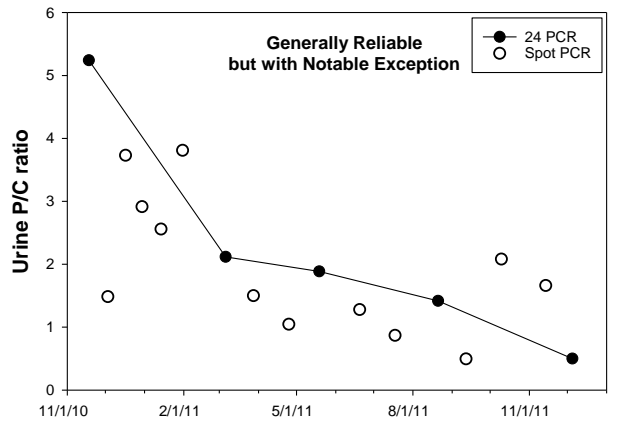

ID 01181

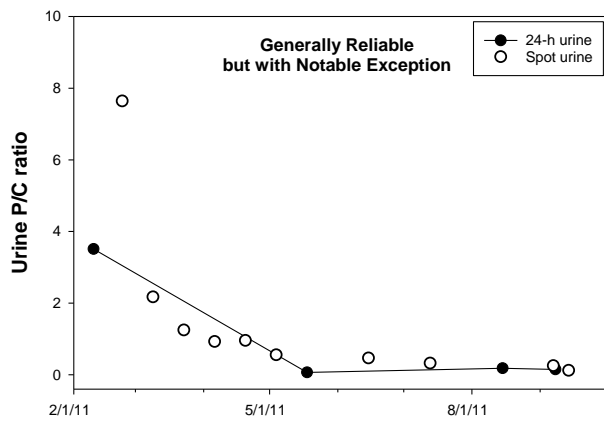

ID 01325

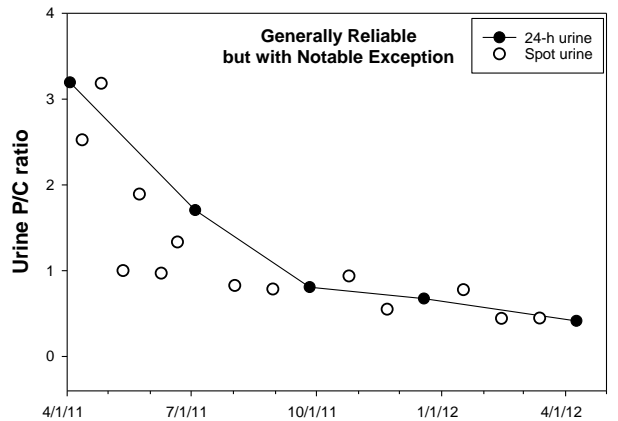



ID 01350

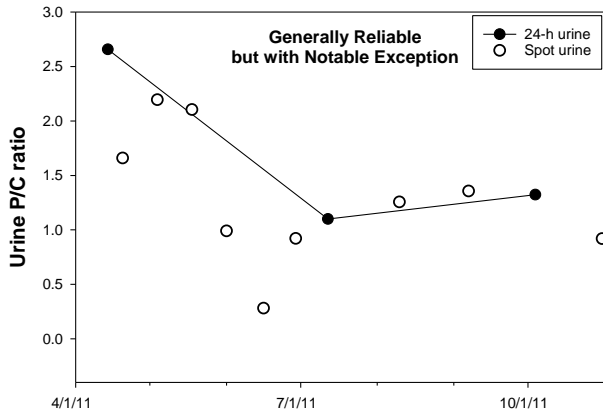

ID 01446

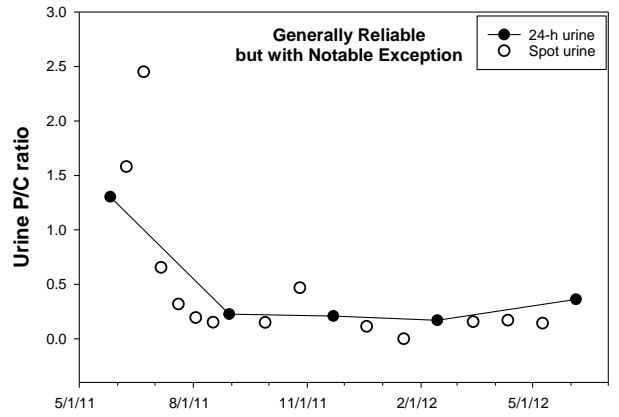

ID 01484

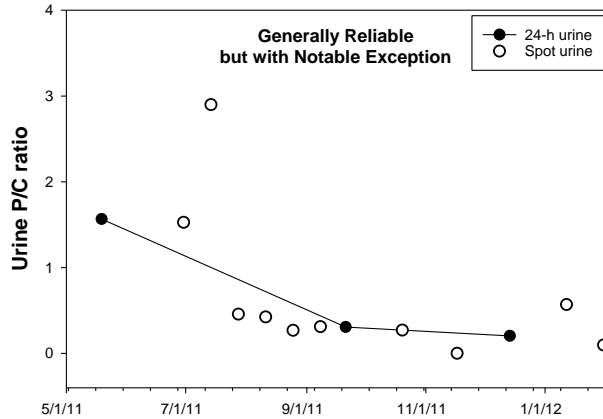

ID 01519

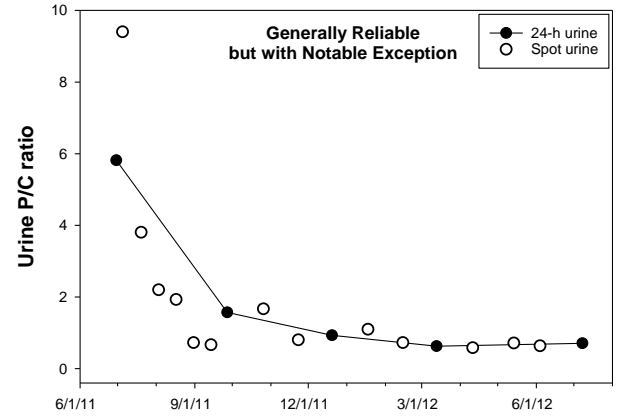

ID 01623

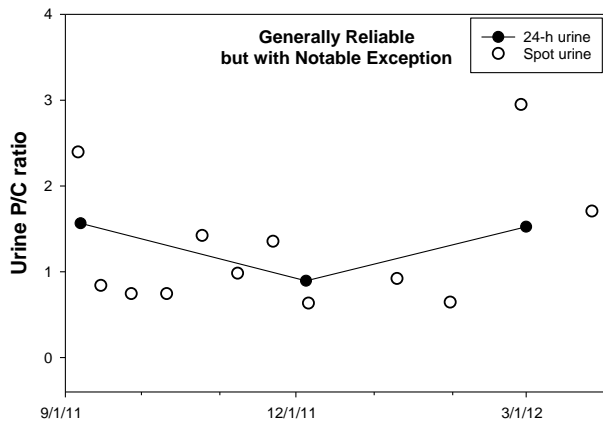

ID 01651

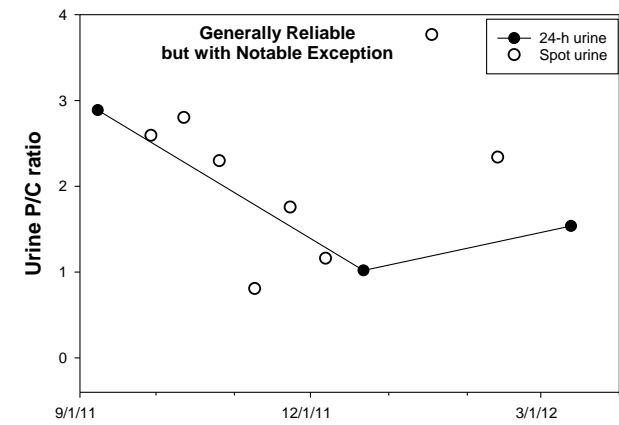

ID 01775

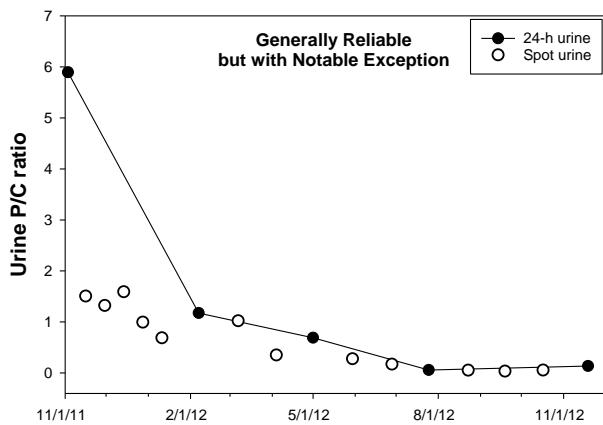

ID 02002

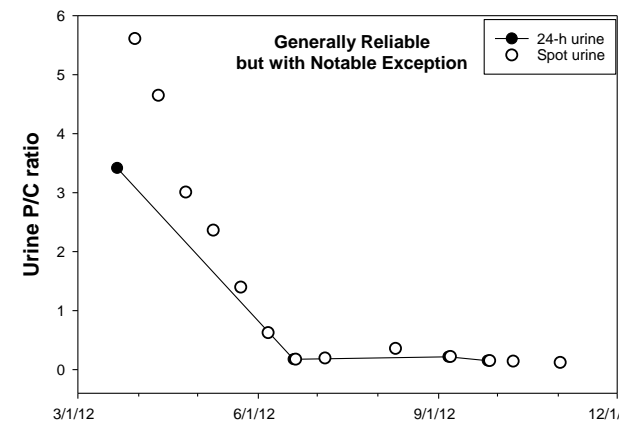

ID 02124

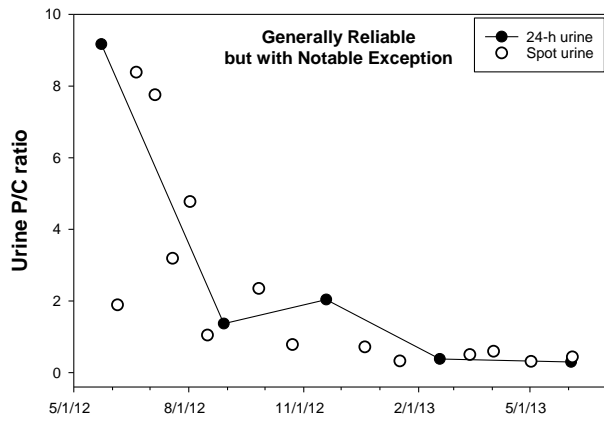

ID 00100

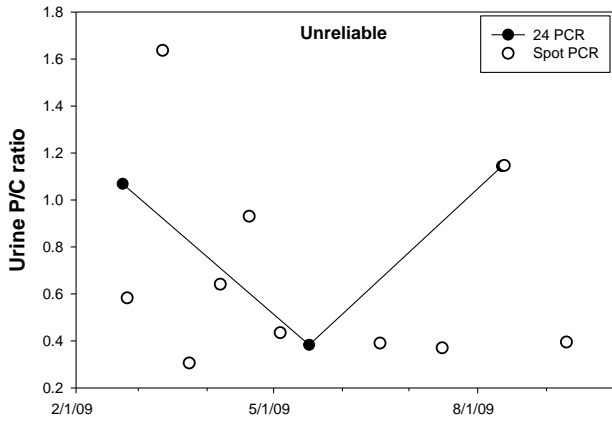

ID 00137

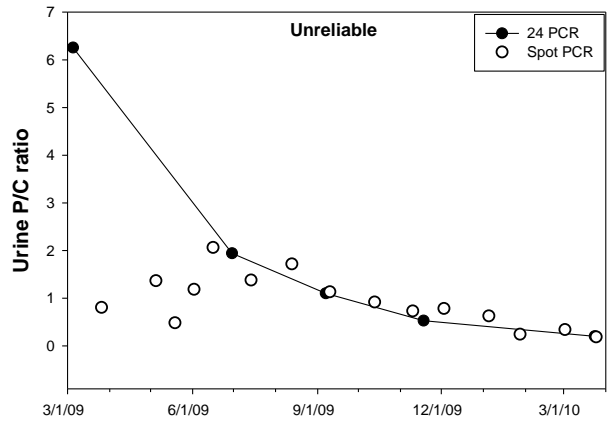

ID 00232

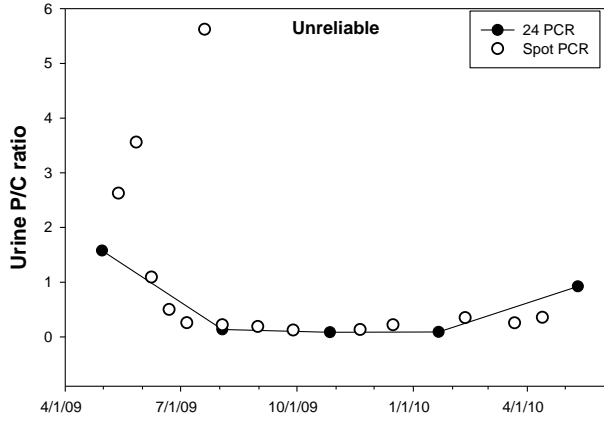

ID 00307

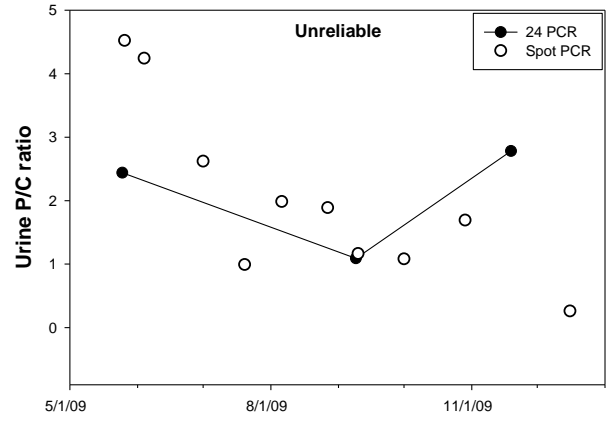

ID 00388

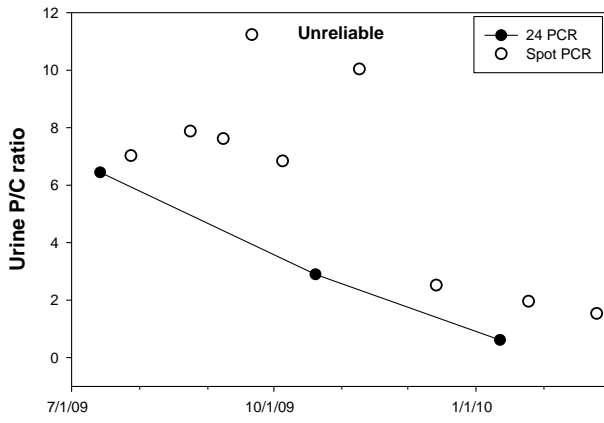

ID 00416

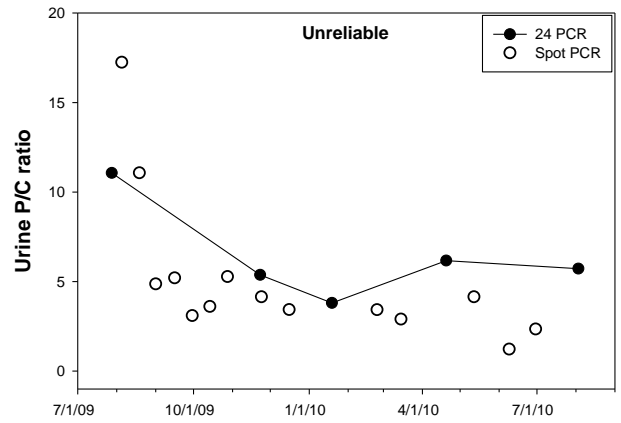

ID 00496

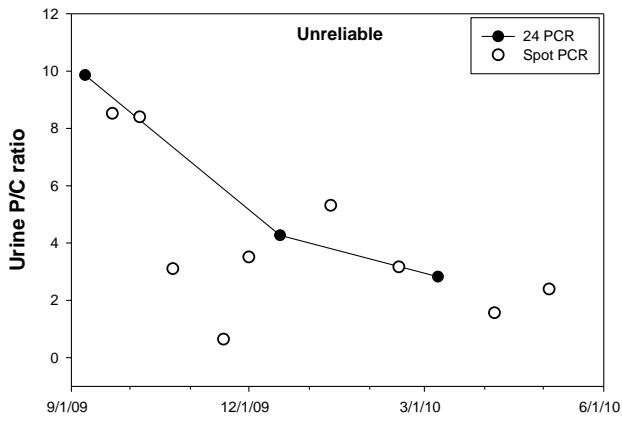

ID 00513

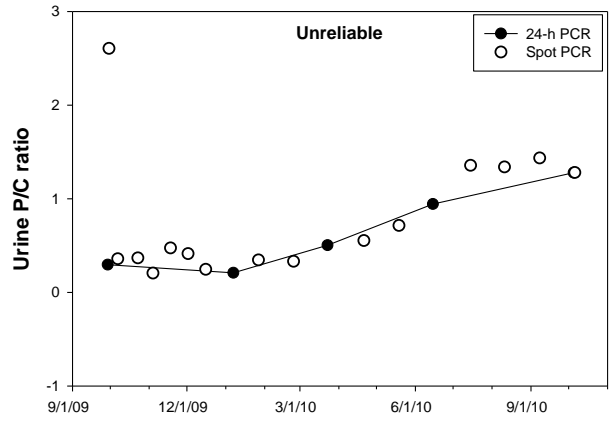

ID 00570

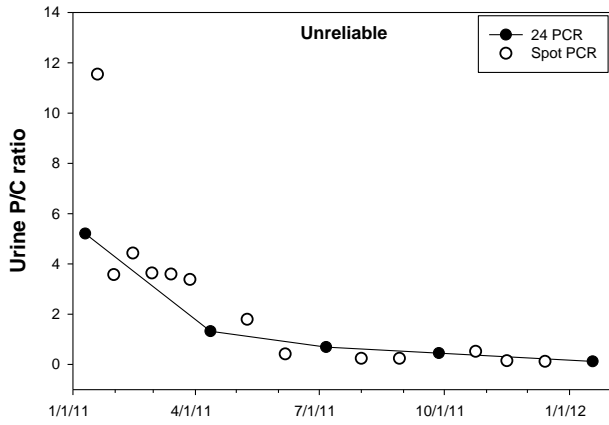

ID 00638

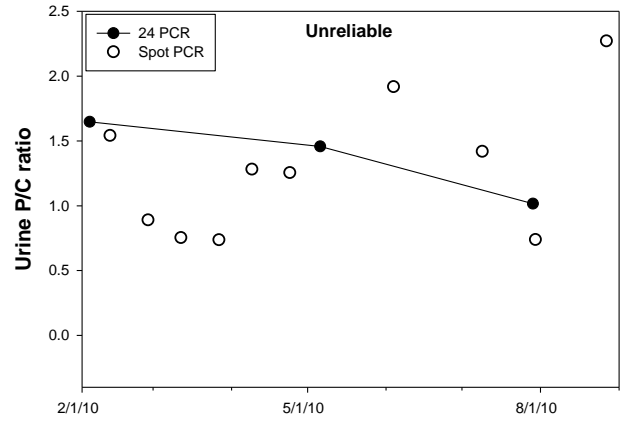

ID 00643

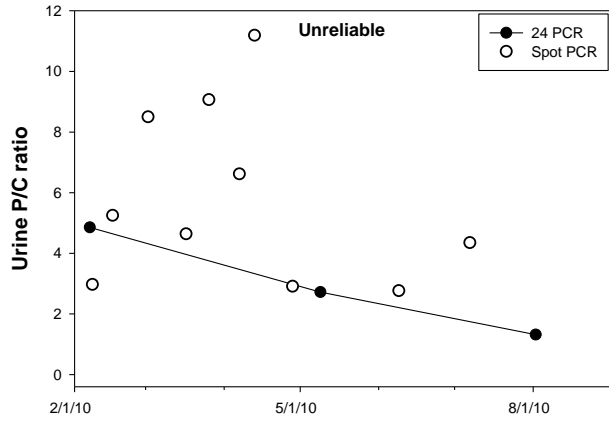

ID 00677

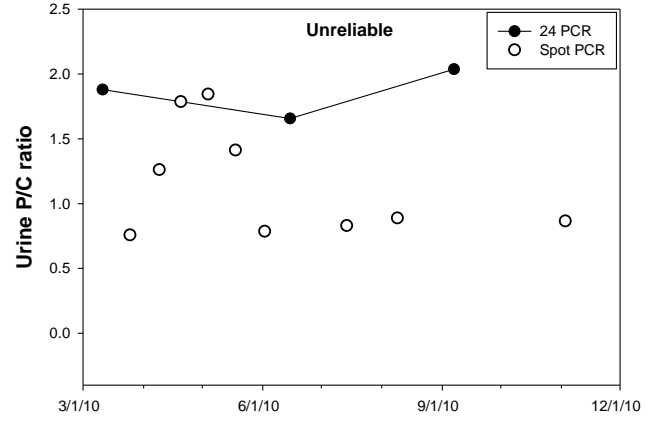

ID 00734

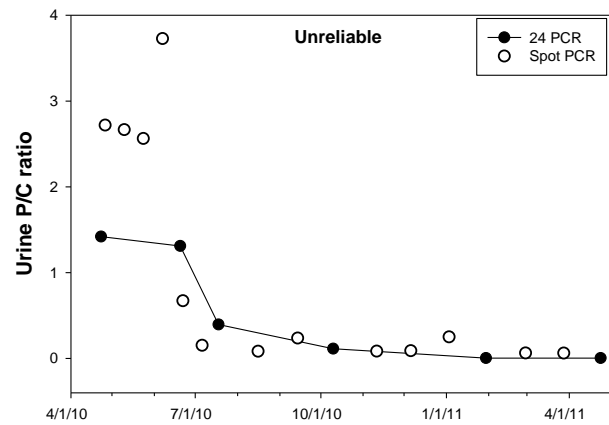

ID 00747

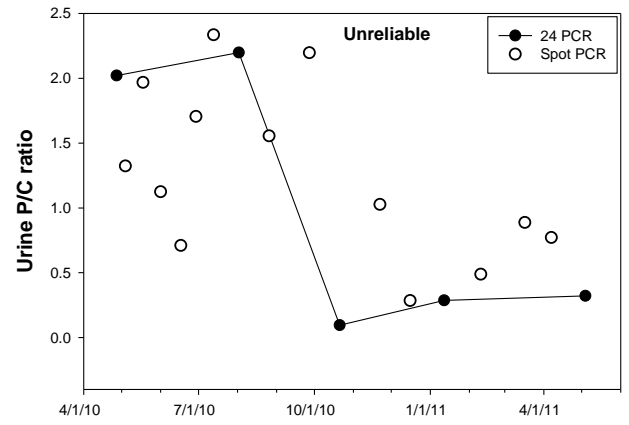

ID 00865

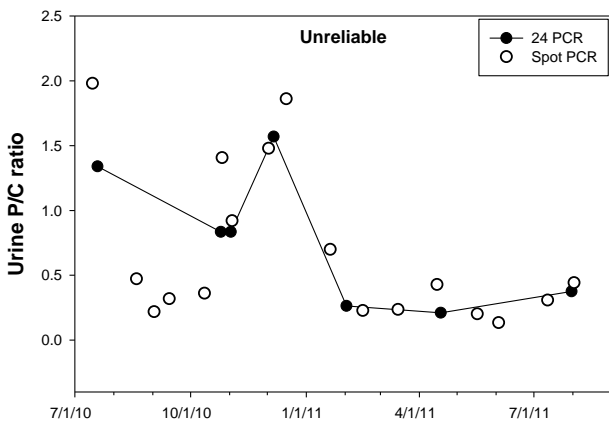

ID 00886

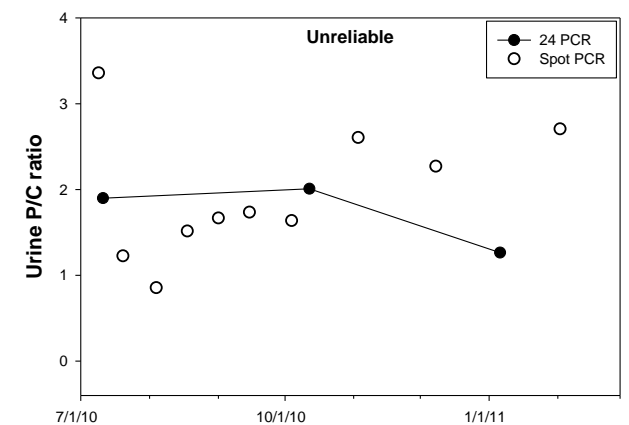

ID 00938

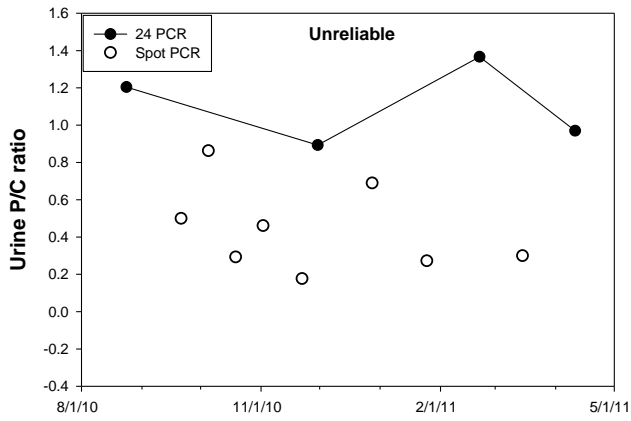

ID 01052

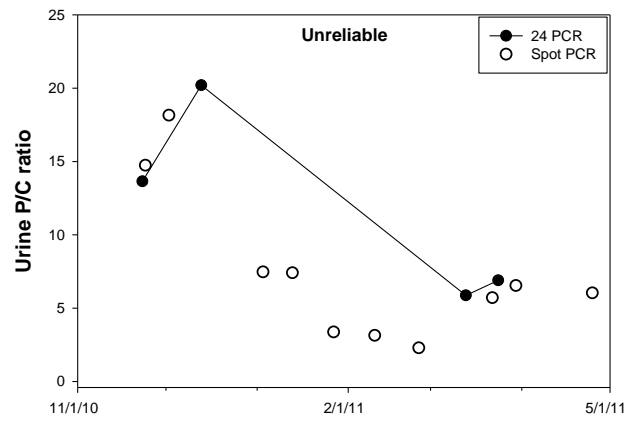

ID 01195

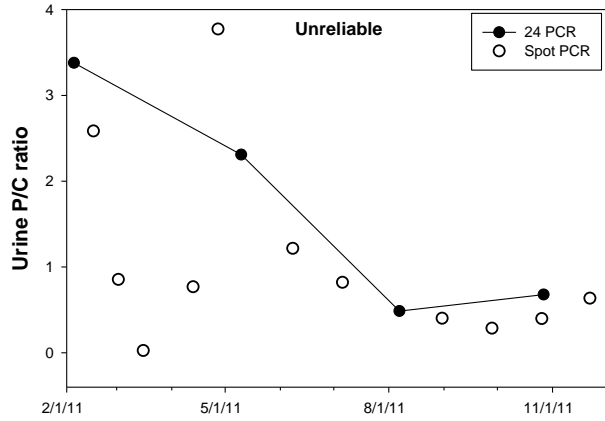

ID 01223

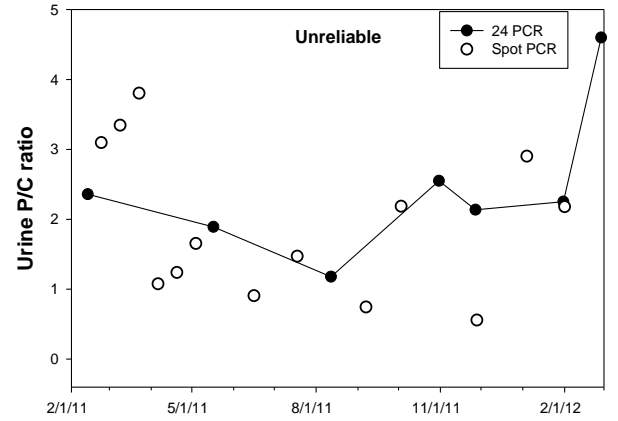

ID 01252

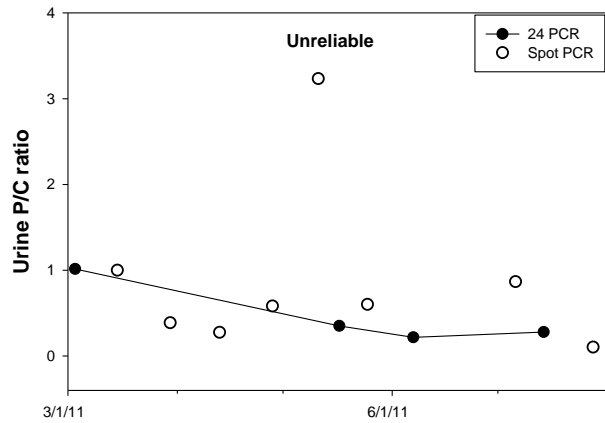

ID 01334

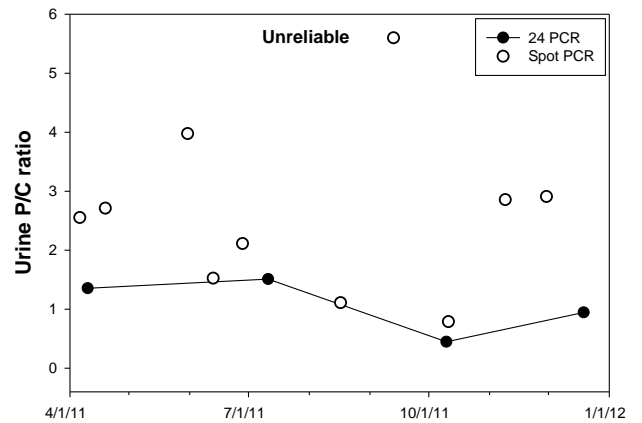

ID 01379

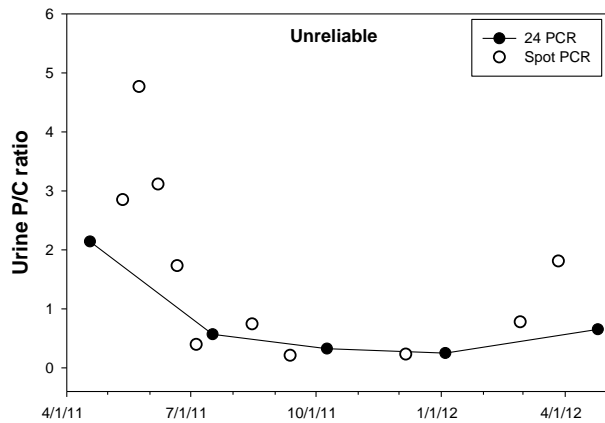

ID 01527

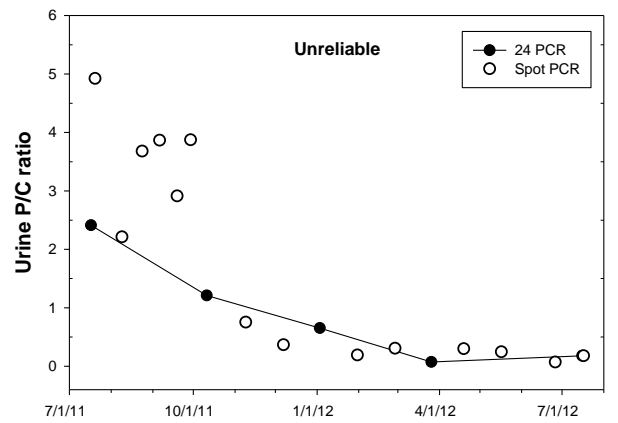

ID 01569

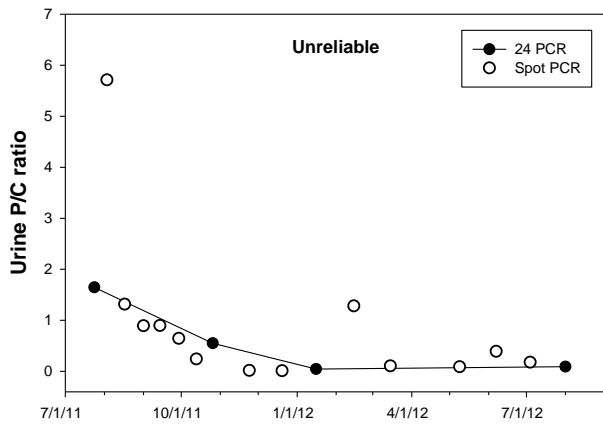

ID 01636

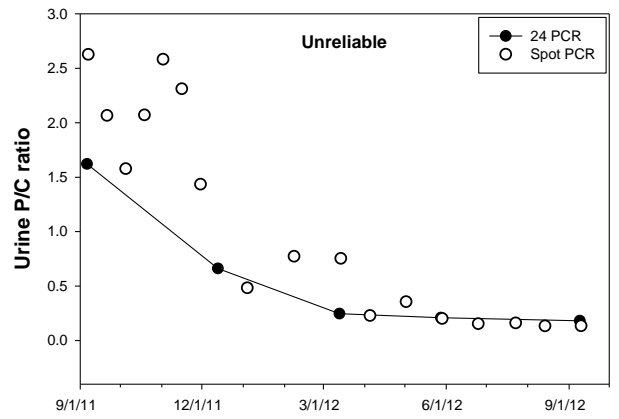

ID 01761

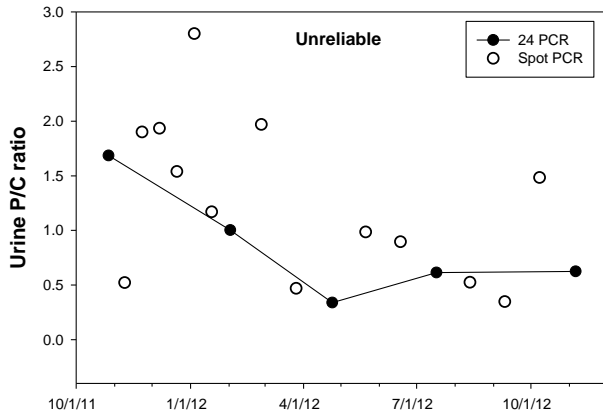

ID 01803

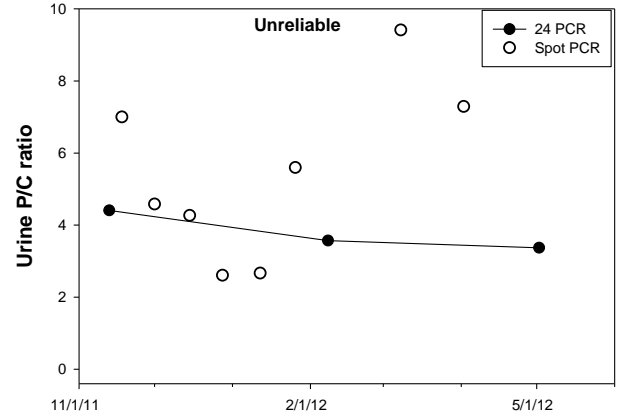

ID 01832

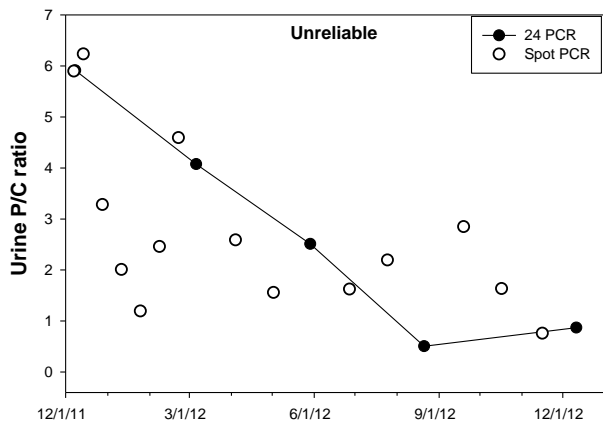

ID 01978

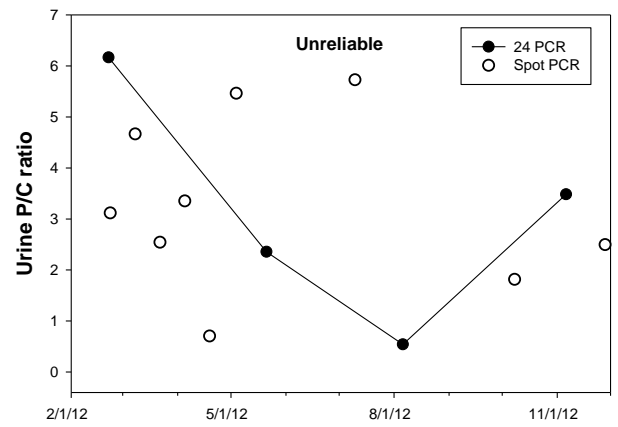

ID 01987

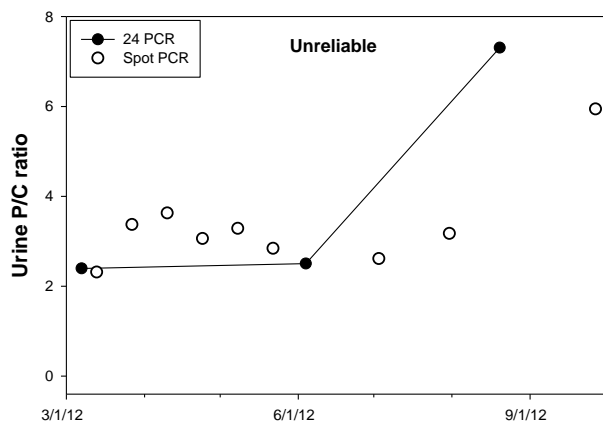

ID 01997

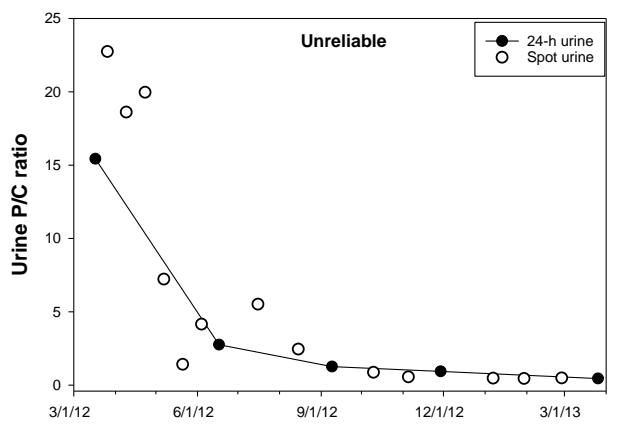

**ID 02047**

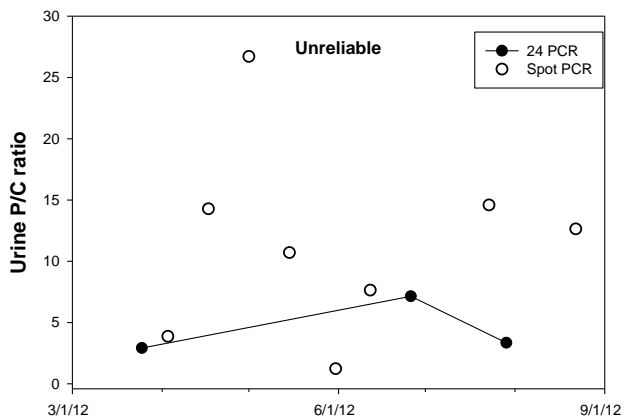

**ID 02083**

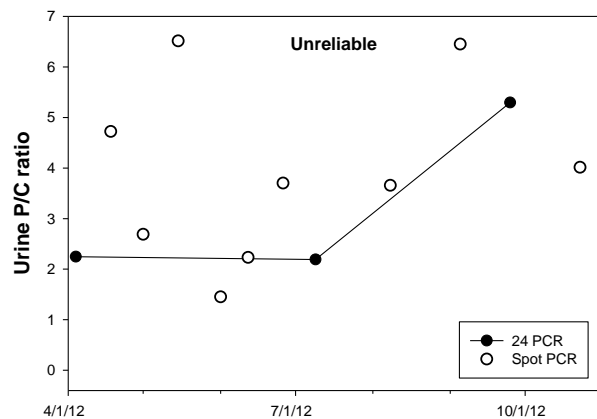

**ID 02166**

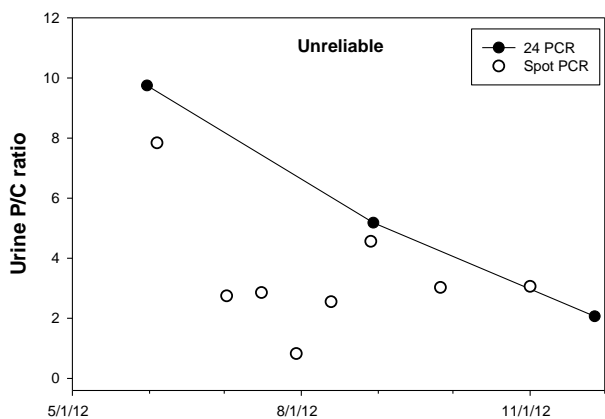

**ID 02180**

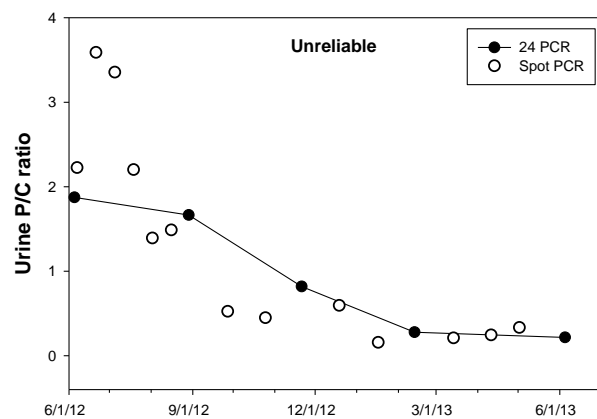

Supplement: mmc1.pdf [file mmc1.pdf]
